# Supplementary material
Source: publisher figshare collection journal article supplement (https://gsajournals.figshare.com/ndownloader/files/13164809)
Supplement: Supplementary file 1 [file 13164809]

## Sheet: TableS1_Methow_FishMeta
Table S1. Metadata for individual fish used in RAD-Seq and RRBS. Columns 2 and 3 indicate whether the fish was used in the final RAD-Seq and RRBS analysis respectively (Y = yes, N = no).
sampleID	RAD	RRBS	Sex	Type	Hatchery Origin	Age	Length (mm)	RAD-Seq barcode	RAD library ID
1	Y	N	F	Natural	.	4	583	AAACGG	RAD1
2	N	N	F	Natural	.	4	565	ACTCTT	RAD1
3	Y	Y	M	Natural	.	5	730	ATTCCG	RAD1
4	Y	N	F	Natural	.	4	704	CGAGGC	RAD1
5	Y	N	M	Natural	.	4	590	GAAATG	RAD1
9	Y	N	F	Natural	.	4	575	TAAGCT	RAD1
10	Y	N	F	Natural	.	unknown	682	TCTTCT	RAD1
11	Y	Y	M	Natural	.	5	790	AACGTT	RAD1
12	Y	N	M	Natural	.	4	620	ACTGGC	RAD1
13	Y	N	F	Natural	.	4	622	CAAAAA	RAD1
14	N	N	M	Natural	.	4	630	CGCAGA	RAD1
15	Y	N	F	Natural	.	4	606	GAACCA	RAD1
16	Y	N	F	Natural	.	4	540	GGCAAG	RAD1
17	Y	N	F	Natural	.	5	727	TAATTC	RAD1
18	Y	N	F	Natural	.	5	675	TGAACC	RAD1
19	Y	N	F	Natural	.	4	515	AACTGA	RAD1
20	Y	N	F	Natural	.	4	566	AGCCAT	RAD1
22	Y	Y	M	Natural	.	5	620	CAATCG	RAD1
23	N	Y	M	Natural	.	4	600	CGCGTG	RAD1
24	Y	N	F	Natural	.	4	604	GACGAC	RAD1
25	Y	N	M	Natural	.	4	580	GGGCGC	RAD1
26	N	N	M	Hatchery	WNFH	3	550	TACACA	RAD1
27	Y	N	F	Hatchery	WNFH	4	540	TGACAA	RAD1
28	Y	N	F	Hatchery	WNFH	unknown	560	AAGACG	RAD1
29	Y	N	F	Hatchery	WNFH	5	690	AGCGCA	RAD1
30	N	N	F	Hatchery	WNFH	4	680	CACCTC	RAD1
31	Y	Y	M	Hatchery	WNFH	4	700	CGGTCC	RAD1
32	Y	N	M	Hatchery	WNFH	5	710	GACTCT	RAD1
33	Y	Y	M	Hatchery	WNFH	4	670	GGGGCG	RAD1
34	Y	N	M	Hatchery	WNFH	3	600	TACGGG	RAD1
35	N	N	M	Hatchery	WNFH	3	570	TGCCCG	RAD1
36	Y	N	M	Hatchery	WNFH	4	560	AAGCTA	RAD1
37	Y	N	M	Hatchery	WNFH	4	570	AGGGTC	RAD1
38	N	N	F	Natural	.	5	729	CAGGCA	RAD1
39	Y	Y	M	Natural	.	4	570	CGTCTA	RAD2
40	Y	N	F	Natural	.	5	698	GAGAGA	RAD2
41	Y	N	F	Natural	.	4	604	GGTACA	RAD2
42	Y	N	F	Natural	.	unknown	750	TAGTAT	RAD2
43	Y	Y	M	Natural	.	4	610	TGCTTA	RAD2
44	Y	N	F	Natural	.	4	570	AATATC	RAD2
46	Y	N	F	Hatchery	WNFH	4	500	CATACT	RAD2
47	Y	N	M	Hatchery	WNFH	3	570	CGTGAT	RAD2
50	Y	N	F	Hatchery	Wells Hatchery	4	760	TATCAC	RAD2
53	Y	N	F	Hatchery	Wells Hatchery	3	550	AGTAGG	RAD2
55	Y	N	F	Hatchery	Wells Hatchery	4	750	CTACAG	RAD2
56	Y	N	F	Hatchery	Wells Hatchery	4	720	GCAGAT	RAD2
58	Y	N	F	Hatchery	Wells Hatchery	3	620	TCAAAG	RAD2
59	Y	N	F	Hatchery	Wells Hatchery	4	750	TTATGA	RAD2
60	Y	N	F	Hatchery	Wells Hatchery	3	590	ACAAGA	RAD2
61	Y	N	F	Hatchery	Wells Hatchery	4	700	AGTTAA	RAD2
62	Y	N	F	Hatchery	Wells Hatchery	4	690	CCCGGT	RAD2
64	Y	N	F	Hatchery	Wells Hatchery	4	690	GCATGG	RAD2
67	Y	N	F	Hatchery	Wells Hatchery	4	720	TTCCGT	RAD2
68	Y	N	F	Hatchery	Wells Hatchery	3	600	ACAGCG	RAD2
70	Y	N	F	Hatchery	Wells Hatchery	4	740	CCCTAA	RAD2
71	Y	N	F	Hatchery	Wells Hatchery	4	720	CTGCGA	RAD2
73	Y	Y	M	Hatchery	Wells Hatchery	4	720	GTCATC	RAD2
75	Y	N	M	Hatchery	Wells Hatchery	unknown	470	TTCTAG	RAD3
78	Y	Y	M	Hatchery	Wells Hatchery	4	760	CCGAGG	RAD3
81	Y	Y	M	Hatchery	Wells Hatchery	3	560	GTGCCT	RAD3
83	Y	Y	M	Hatchery	Wells Hatchery	3	600	TTGAGC	RAD3
84	Y	Y	M	Hatchery	Wells Hatchery	3	600	ACCATG	RAD3
88	Y	Y	M	Hatchery	Wells Hatchery	3	570	GCGCTG	RAD3
89	Y	Y	M	Hatchery	Wells Hatchery	3	610	GTGTAA	RAD3
91	Y	N	M	Hatchery	Wells Hatchery	3	570	TTTAAT	RAD3
92	Y	Y	M	Hatchery	Wells Hatchery	3	610	ACCCCC	RAD3
93	Y	Y	M	Natural	.	4	570	ATGTTG	RAD3
94	Y	N	M	Natural	.	4	620	CCTAAC	RAD3
95	Y	Y	M	Natural	.	4	630	CTTTGC	RAD3
96	Y	N	M	Natural	.	4	600	GCTCAA	RAD3
97	Y	N	M	Natural	.	4	550	GTTGGA	RAD3
98	Y	N	F	Natural	.	4	643	TCTCGG	RAD3
99	Y	N	M	Natural	.	unknown	570	TTTGTC	RAD3
100	Y	Y	M	Natural	.	5	770	TCCTGC	RAD3
101	Y	N	M	Natural	.	4	590	TTCCGT	RAD3
102	Y	N	F	Natural	.	4	557	ACAGCG	RAD3
103	Y	N	F	Natural	.	4	578	ATAGTA	RAD3
105	Y	Y	M	Natural	.	4	590	CTGCGA	RAD3
106	Y	N	F	Hatchery	WNFH	4	520	GCCGTA	RAD3
